# Supplementary material for: Dimer-monomer transition defines a hyper-thermostable peptidoglycan hydrolase mined from bacterial proteome by lysin-derived antimicrobial peptide-primed screening
Source: eLife journal article supplement (doi:10.7554/elife.98266), 2024-07-15
Supplement: fig2-figsupp1-data1 [file elife-98266-fig2-figsupp1-data1-v1.zip]

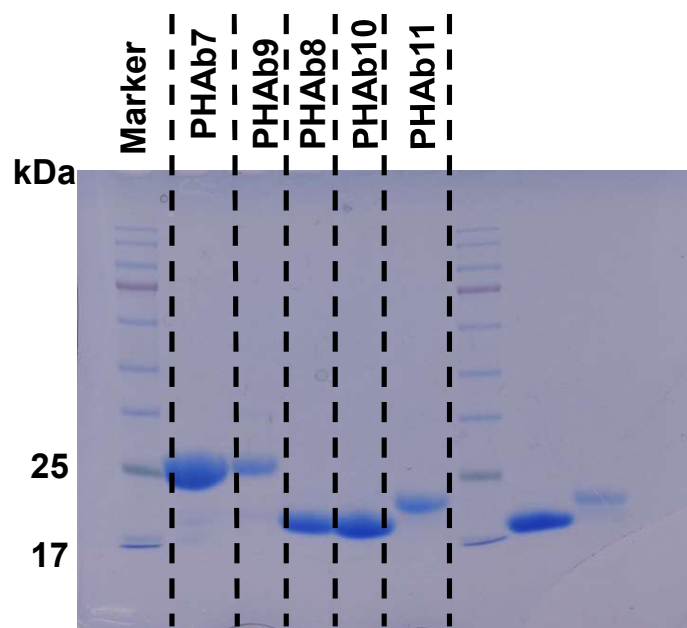

Figure 2-figure supplement 1-source data 1. PDF file containing original SDS-PAGE gel for Figure 2-figure supplement 1, indicating the relevant bands.
