# Supplementary material for: Dimer-monomer transition defines a hyper-thermostable peptidoglycan hydrolase mined from bacterial proteome by lysin-derived antimicrobial peptide-primed screening
Source: eLife journal article supplement (doi:10.7554/elife.98266), 2024-07-15
Supplement: fig5-data1 [file elife-98266-fig5-data1-v1.zip]

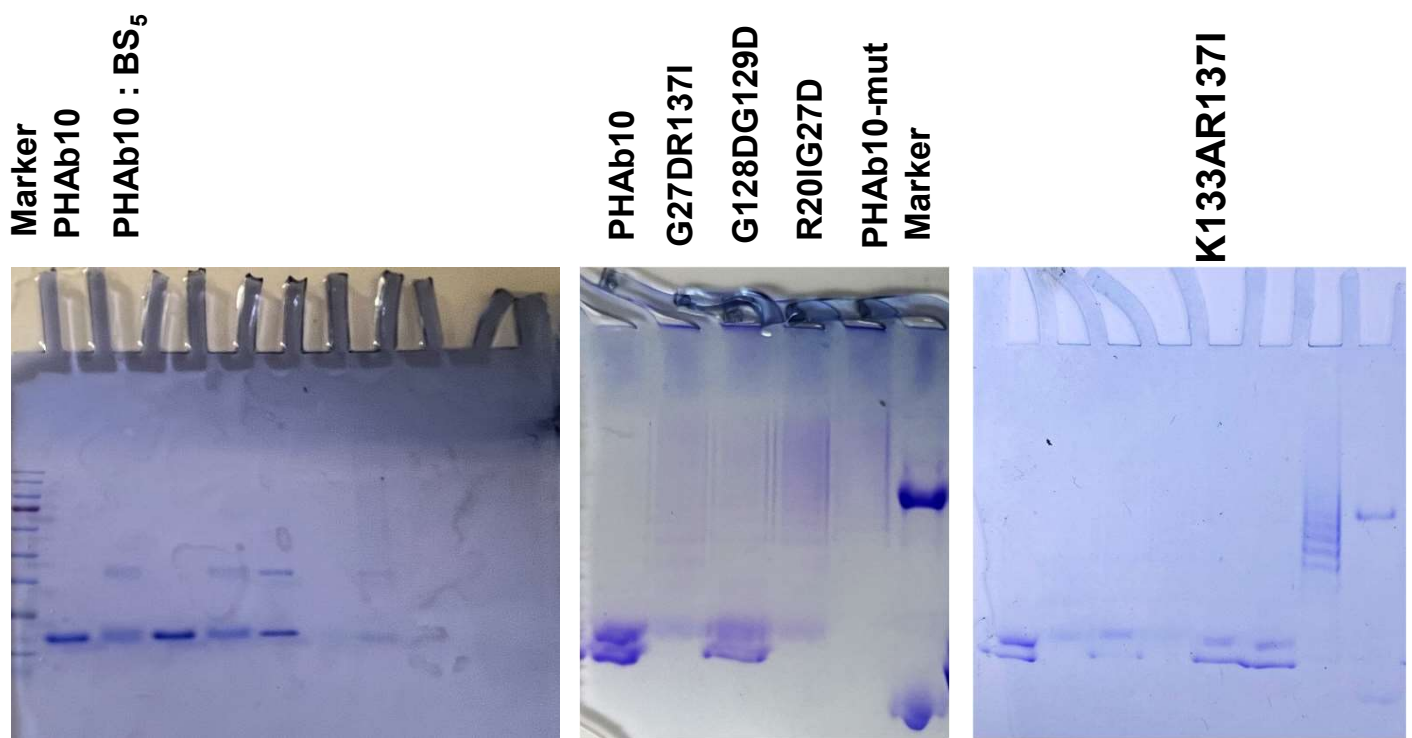

Figure 5-source data 1. PDF file containing original SDS/Native-PAGE gels for Figure 5b and 5c, indicating the relevant bands. The left gel corresponds to Figure 5b; the middle and the right gels correspond to Figure 5c.
